# Supplementary material
Source: PubMed Central journal article supplement (PMC1194936)

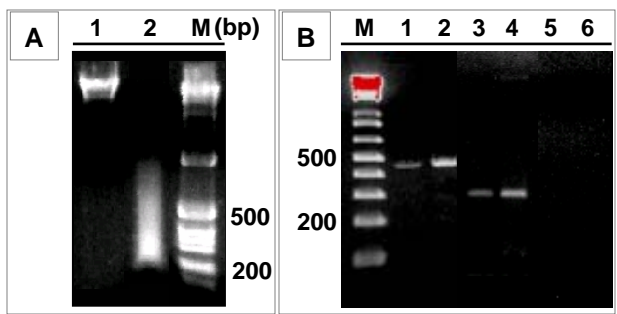

Supplement: pnas_0505394102_1.pdf [file pnas_0505394102_1.pdf]

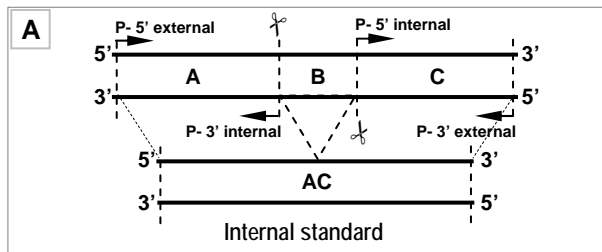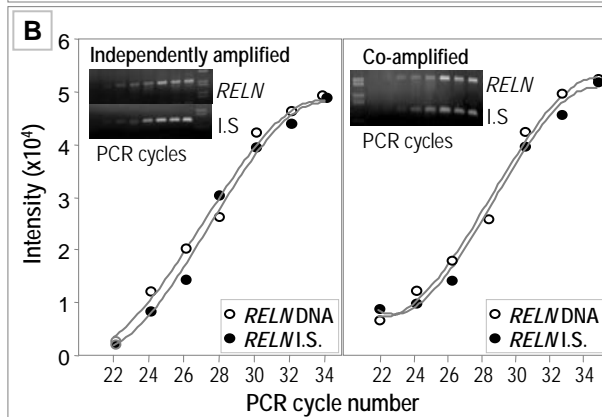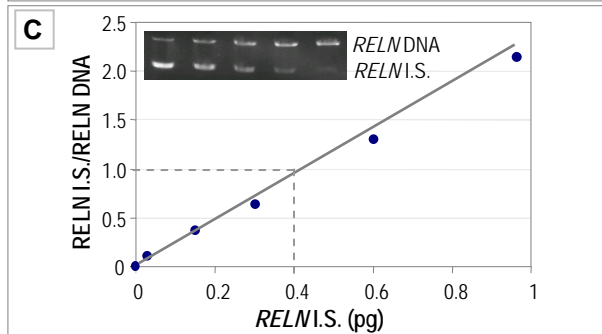

Supplement: pnas_0505394102_2.pdf [file pnas_0505394102_2.pdf]

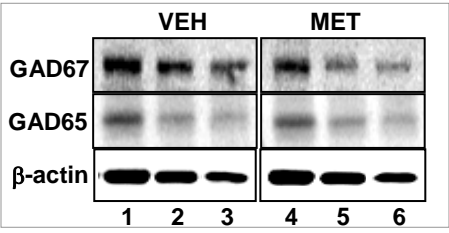

Supplement: pnas_0505394102_3.pdf [file pnas_0505394102_3.pdf]

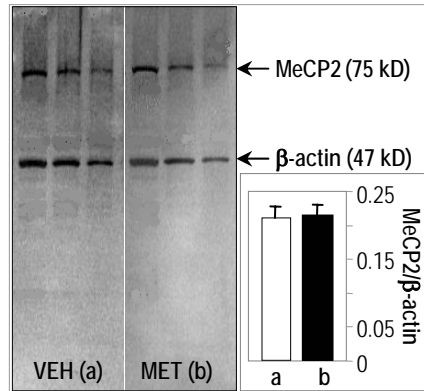

Supplement: pnas_0505394102_4.pdf [file pnas_0505394102_4.pdf]
